# Supplementary material
Source: publisher figshare collection journal article supplement (https://sage.figshare.com/ndownloader/files/20161823)
Supplement: Supplementary file 1 [file 20161823]

**Table 3 Supplement. Mediating Effects of Managerial Responses (Math)**

|                                                     | First condition       | Second condition                                    |                                                 |                                                |                                         | Third and fourth conditions |                      |
|-----------------------------------------------------|-----------------------|-----------------------------------------------------|-------------------------------------------------|------------------------------------------------|-----------------------------------------|-----------------------------|----------------------|
|                                                     | Math without mediator | Per-pupil general operating spending (in thousands) | Per-pupil instructional spending (in thousands) | Per-pupil debt service spending (in thousands) | Per-pupil other spending (in thousands) | Math with mediator          | Math with mediator   |
| <b>Financial Condition Measures</b>                 |                       |                                                     |                                                 |                                                |                                         |                             |                      |
| Per-pupil debt burden (log)                         | -0.078***<br>(0.021)  | -1.214***<br>(0.282)                                | -0.188***<br>(0.060)                            | 0.735***<br>(0.0521)                           | -0.016<br>(0.067)                       | -0.079***<br>(0.022)        | -0.073***<br>(0.021) |
| <b>Mediators</b>                                    |                       |                                                     |                                                 |                                                |                                         |                             |                      |
| Per-pupil general operating spending (in thousands) |                       |                                                     |                                                 |                                                |                                         | -0.001<br>(0.003)           |                      |
| Per-pupil instructional spending (in thousands)     |                       |                                                     |                                                 |                                                |                                         |                             | 0.024**<br>(0.010)   |
| <b>Control Variables</b>                            |                       |                                                     |                                                 |                                                |                                         |                             |                      |
| Population (log)                                    | 0.634*<br>(0.353)     | -1.799<br>(1.576)                                   | -0.674<br>(0.509)                               | -0.164<br>(0.257)                              | -1.046<br>(0.903)                       | 0.632*<br>(0.354)           | 0.650*<br>(0.357)    |
| % Free-lunch eligibility                            | -0.014***<br>(0.002)  | -0.009<br>(0.009)                                   | -0.004<br>(0.004)                               | -0.001<br>(0.002)                              | -0.006<br>(0.007)                       | -0.014***<br>(0.002)        | -0.014***<br>(0.002) |
| % English learners                                  | 0.040<br>(0.042)      | -0.040<br>(0.059)                                   | -0.015<br>(0.018)                               | -0.002<br>(0.012)                              | 0.049<br>(0.040)                        | 0.040<br>(0.042)            | 0.041<br>(0.041)     |
| % Black                                             | 0.022***<br>(0.008)   | -0.002<br>(0.031)                                   | 0.068***<br>(0.018)                             | -0.006<br>(0.009)                              | 0.097***<br>(0.026)                     | 0.0215***<br>(0.008)        | 0.020**<br>(0.008)   |
| % Hispanic                                          | -0.010<br>(0.008)     | 0.017<br>(0.020)                                    | 0.008<br>(0.010)                                | -0.021***<br>(0.006)                           | 0.012<br>(0.019)                        | -0.010<br>(0.008)           | -0.011<br>(0.008)    |
| Per-capita personal income (in thousands)           | 0.035***<br>(0.005)   | 0.073***<br>(0.028)                                 | -0.011<br>(0.013)                               | -0.009<br>(0.009)                              | -0.061**<br>(0.024)                     | 0.035***<br>(0.005)         | 0.035***<br>(0.005)  |
| Unemployment rate                                   | -0.040*<br>(0.023)    | 0.210<br>(0.162)                                    | -0.093<br>(0.060)                               | 0.070**<br>(0.036)                             | -0.127<br>(0.133)                       | -0.040*<br>(0.023)          | -0.038<br>(0.023)    |
| Constant                                            | -6.280*<br>(3.323)    | 26.140<br>(16.590)                                  | 18.990***<br>(4.957)                            | -3.544<br>(2.584)                              | 20.600**<br>(8.719)                     | -6.252*<br>(3.336)          | -6.736**<br>(3.396)  |
| Observations                                        | 5,952                 | 5,952                                               | 5,952                                           | 5,952                                          | 5,952                                   | 5,952                       | 5,952                |
| R <sup>2</sup>                                      | 0.077                 | 0.074                                               | 0.105                                           | 0.126                                          | 0.188                                   | 0.077                       | 0.080                |
| District FE                                         | Yes                   | Yes                                                 | Yes                                             | Yes                                            | Yes                                     | Yes                         | Yes                  |
| Year FE                                             | Yes                   | Yes                                                 | Yes                                             | Yes                                            | Yes                                     | Yes                         | Yes                  |

Robust clustered standard errors in parentheses (clustered at the school district level); \*\*\* p<0.01, \*\* p<0.05, \* p<0.1

Note: The per-pupil debt burden is two-year moving averaged.
